# Supplementary material
Source: publisher site journal article supplement (https://www.spandidos-publications.com/7418/downloadSupplementary)
Supplement: Supplementary file 1 [file downloadSupplementary]

Table SI. Characteristics of the studies included in the meta-analysis.

| First author, year                | Country | Cancer type | Study design  | ICI treatment                                                     | Sample size, n | Line of treatment         | GPS/mGPS | Male/female, n | Median age, years (range) | Follow-up time, month | Score of 0/1/2, n | Analysis model              | Outcome    | NO S | (Refs.) |
|-----------------------------------|---------|-------------|---------------|-------------------------------------------------------------------|----------------|---------------------------|----------|----------------|---------------------------|-----------------------|-------------------|-----------------------------|------------|------|---------|
| Sakai <i>et al</i> , 2022         | Japan   | GC          | Retrospective | Nivolumab                                                         | 100            | Third- or further -line   | GPS      | 78/22          | 71 (38-89)                | 5.0 (0.8-33.6)        | NR                | Multivariate                | OS         | 5    | (28)    |
| Yang <i>et al</i> , 2022          | China   | ICC         | Retrospective | Nivolumab, pembrolizumab, toripalimab, camrelizumab or sintilimab | 73             | NR                        | GPS      | 49/24          | 57 (31-75)                | 11.2                  | 26/40/7           | Univariate                  | OS         | 5    | (29)    |
| Kurosaki <i>et al</i> , 2020      | Japan   | GC          | Retrospective | Nivolumab                                                         | 80             | Third- or further -line   | GPS      | 67/13          | 71 (43-87)                | 5.1                   | 30/32/18          | Univariate and multivariate | PFS and OS | 6    | (30)    |
| Kang <i>et al</i> , 2021          | Korea   | NSCLC       | Retrospective | Pembrolizumab, nivolumab or atezolizumab                          | 78             | Second - or further -line | GPS      | 64/14          | 67 (38-84)                | NR                    | 19/35/24          | Univariate and multivariate | PFS and OS | 5    | (31)    |
| Minichsdorfer <i>et al</i> , 2022 | Austria | Solid tumor | Retrospective | Pembrolizumab or nivolumab                                        | 114            | First- or further -line   | GPS      | 74/40          | 60(22-88)                 | NR                    | 17/61/35          | Univariate                  | PFS/OS     | 5    | (32)    |
| Namikawa <i>et al</i> , 2020      | Japan   | GC          | Retrospective | Nivolumab                                                         | 29             | Second - or               | GPS      | 19/10          | 71 (49-                   | 32.0                  | NR                | Univariate and              | PFS and OS | 5    | (33)    |

|                                            |              |       |                   |                                                        |     |                                    |      |        |                   |                         |              |                                        |               |   |      |
|--------------------------------------------|--------------|-------|-------------------|--------------------------------------------------------|-----|------------------------------------|------|--------|-------------------|-------------------------|--------------|----------------------------------------|---------------|---|------|
|                                            |              |       |                   |                                                        |     | further<br>-line                   |      |        | 86)               |                         |              | multivari<br>ate                       |               |   |      |
| Kasajima<br><i>et al</i> , 2022            | Japan        | NSCLC | Retrospect<br>ive | Pembrolizu<br>mab or<br>atezolizuma<br>b               | 80  | Second<br>- or<br>further<br>-line | GPS  | 56/24  | 71<br>(44-<br>86) | 11.1<br>(0.1-<br>60.1 ) | 42/18/<br>20 | Multivari<br>ate                       | PFS<br>and OS | 5 | (34) |
| Kim <i>et al</i> ,<br>2022                 | Korea        | ESCC  | Retrospect<br>ive | Pembrolizu<br>mab or<br>nivolumab                      | 60  | Second<br>-line                    | GPS  | 56/4   | 68<br>(52-<br>76) | 16.0<br>(7.4-<br>24.5)  | NR           | Univariat<br>e and<br>multivari<br>ate | PFS<br>and OS | 5 | (35) |
| Tokuyama<br><i>et al</i> , 2021            | Japan        | GC    | Retrospect<br>ive | Nivolumab                                              | 45  | Second<br>- or<br>further<br>-line | GPS  | 31/14  | 65<br>(40-<br>81) | NR                      | 25/18/<br>2  | Univariat<br>e                         | PFS           | 6 | (36) |
| Fujiwara <i>et<br/>al</i> , 2021           | Japan        | RCC   | Retrospect<br>ive | Nivolumab                                              | 45  | First-<br>or<br>further<br>-line   | mGPS | NR     | 62<br>(55-<br>69) | 26.4<br>(16.9-<br>30.3) | 29/8/8       | Univariat<br>e and<br>multivari<br>ate | OS            | 6 | (37) |
| Matsuki <i>et<br/>al</i> , 2020            | Japan        | HNSCC | Retrospect<br>ive | Nivolumab                                              | 88  | Second<br>- or<br>further<br>-line | mGPS | 71/17  | 67<br>(23-<br>81) | 6.1<br>(0.8-<br>16.9)   | 41/25/<br>22 | Univariat<br>e and<br>multivari<br>ate | PFS<br>and OS | 6 | (38) |
| Brown <i>et<br/>al</i> , 2021 <sup>a</sup> | USA          | UC    | Retrospect<br>ive | Atezolizuma<br>b,<br>pembrolizu<br>mab or<br>nivolumab | 53  | First-<br>or<br>further<br>-line   | mGPS | 45/8   | 70<br>(32-<br>86) | 27.1                    | 23/15/<br>15 | Univariat<br>e and<br>multivari<br>ate | PFS<br>and OS | 6 | (39) |
| Brown <i>et<br/>al</i> , 2021 <sup>b</sup> | USA          | RCC   | Retrospect<br>ive | NR                                                     | 156 | First-<br>or<br>further<br>-line   | mGPS | 108/48 | 64<br>(23-<br>90) | 24.2                    | 57/62/<br>37 | Univariat<br>e and<br>multivari<br>ate | PFS<br>and OS | 6 | (40) |
| Freitas <i>et<br/>al</i> , 2021            | Portug<br>al | NSCLC | Retrospect<br>ive | Pembrolizu<br>mab or<br>nivolumab                      | 77  | First-<br>or<br>further            | mGPS | 55/22  | 65<br>(44-<br>87) | NR                      | 20/14/<br>11 | Univariat<br>e and<br>multivari        | PFS<br>and OS | 7 | (41) |

|                           |         |          |               |                                                       |     |                           |      |       |            |                |          |                             |            |   |      |
|---------------------------|---------|----------|---------------|-------------------------------------------------------|-----|---------------------------|------|-------|------------|----------------|----------|-----------------------------|------------|---|------|
|                           |         |          |               |                                                       |     | -line                     |      |       |            |                |          | ate                         |            |   |      |
| Diker <i>et al</i> , 2022 | Cyprus  | NSCLC    | Retrospective | Pembrolizumab, nivolumab or nivolumab plus ipilimumab | 102 | First- or further -line   | mGPS | 89/13 | 67 (35-88) | 8.4 (0.0-49.5) | 35/44/23 | Univariate and multivariate | PFS and OS | 5 | (42) |
| Pflug <i>et al</i> , 2021 | Germany | Melanoma | Retrospective | NR                                                    | 117 | First-line                | mGPS | 66/51 | NR         | NR             | NR       | Univariate and multivariate | PFS and OS | 5 | (43) |
| Ogura <i>et al</i> , 2021 | Japan   | NSCLC    | Retrospective | Nivolumab                                             | 34  | First- or second -line    | mGPS | 29/5  | 72 (55-81) | NR             | NR       | Univariate                  | PFS and OS | 6 | (44) |
| Niwa <i>et al</i> , 2020  | Japan   | SGC      | Retrospective | Nivolumab                                             | 24  | Second - or further -line | mGPS | 19/5  | 56 (29-82) | 6.5 (0.6-28.2) | NR       | Univariate                  | PFS and OS | 5 | (45) |

<sup>a,b</sup>Denote different studies conducted by the same author in the same year and correspond to the same studies in the figures. GC, gastric cancer; NSCLC, non-small cell lung cancer; GPS, Glasgow prognostic score; mGPS, modified GPS; NOS, Newcastle-Ottawa Scale; NR, not reported; PFS, progression-free survival; OS, overall survival; HNSCC, head and neck squamous cell carcinoma; UC, urothelial carcinoma; RCC, renal cell carcinoma; ESCC, esophageal squamous cell carcinoma; ICC, intrahepatic cholangiocarcinoma; SGC, salivary gland carcinoma.
